# Supplementary material for: Skull Development, Ossification Pattern, and Adult Shape in the Emerging Lizard Model Organism Pogona vitticeps: A Comparative Analysis With Other Squamates
Source: PubMed Central journal article supplement (PMC5882870; doi:10.3389/fphys.2018.00278), 2018-03-28

**Additional file 4.** (A,B) 3D landmark points on the skull of the lizard *Pogona vitticeps* in lateral (A), ventral (B, top panel), and dorsal (B, bottom panel) views. (C) Skull of the lizard *Pogona vitticeps* in posterior views, showing the 3D landmark points on the back of the skull. See Additional file 6 for a complete list of landmarks.

**A**

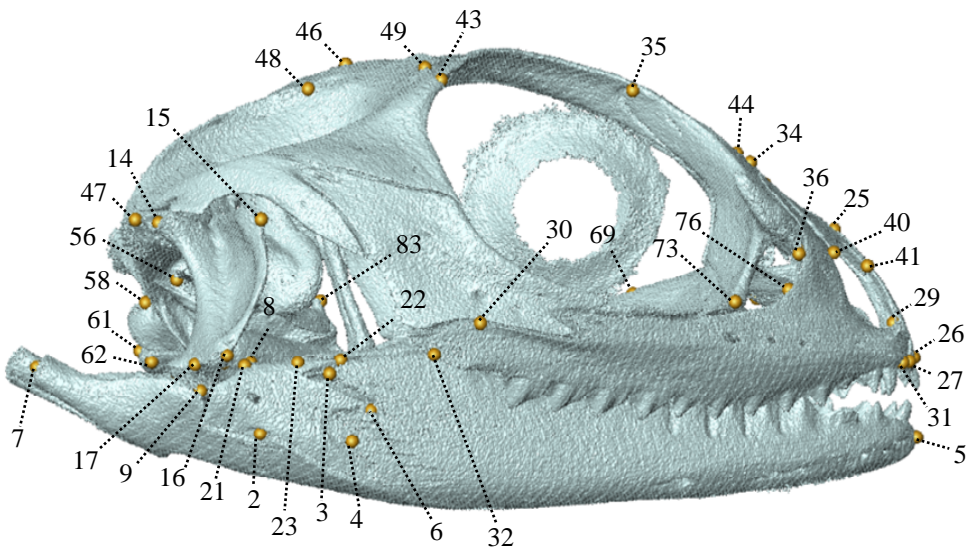

**B**

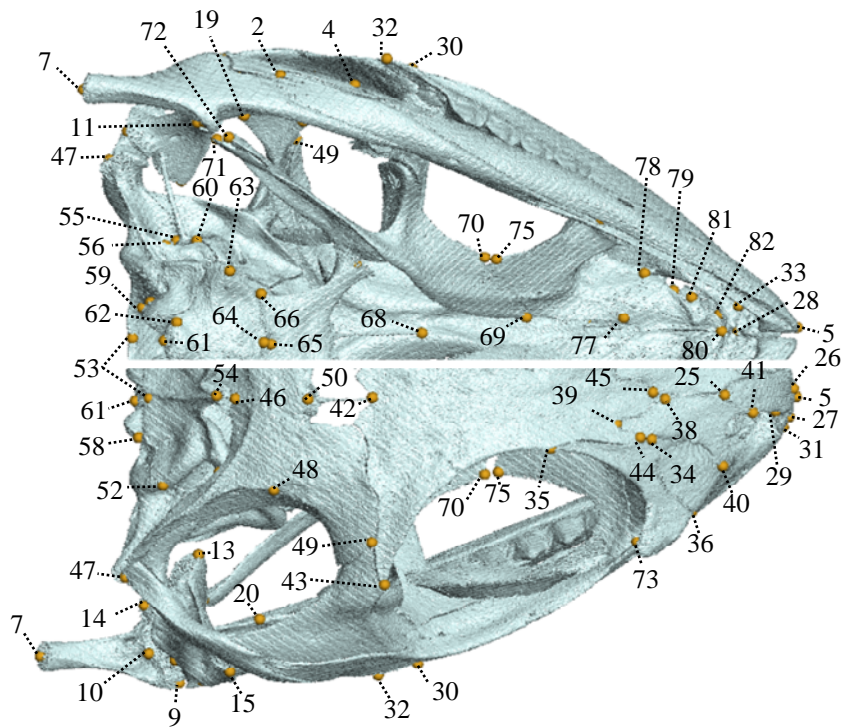

**C**

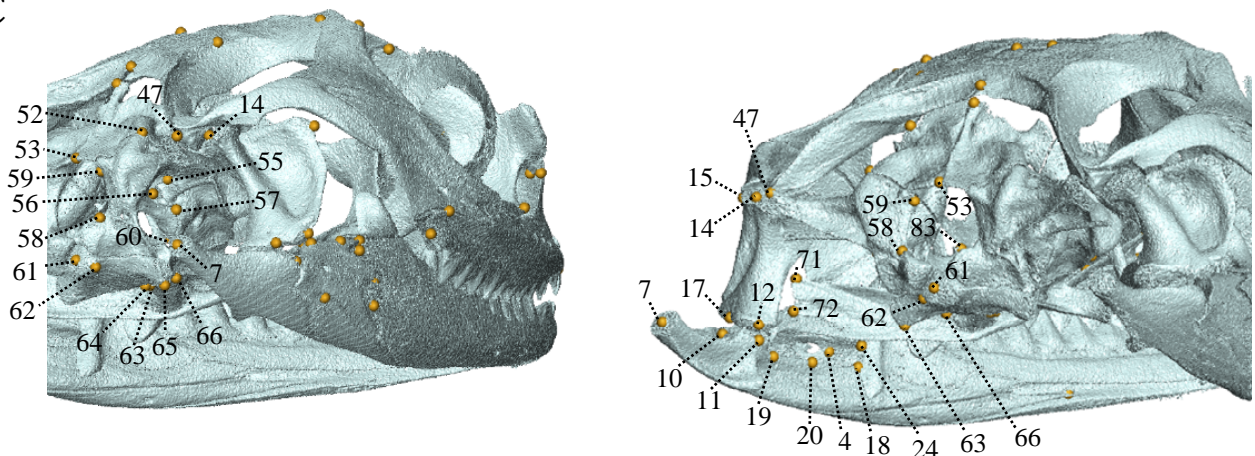

Supplement: DataSheet4.pdf [file DataSheet4.pdf]
