# Supplementary material for: Skull Development, Ossification Pattern, and Adult Shape in the Emerging Lizard Model Organism Pogona vitticeps: A Comparative Analysis With Other Squamates
Source: PubMed Central journal article supplement (PMC5882870; doi:10.3389/fphys.2018.00278), 2018-03-28

**Additional file 7.** Plots of principal component (PC) scores showing the cranium (A) and mandible (B) shape distribution of lizards (grey shading) and snakes (red shading). For the complete list of species (with full names) see Additional file 2.

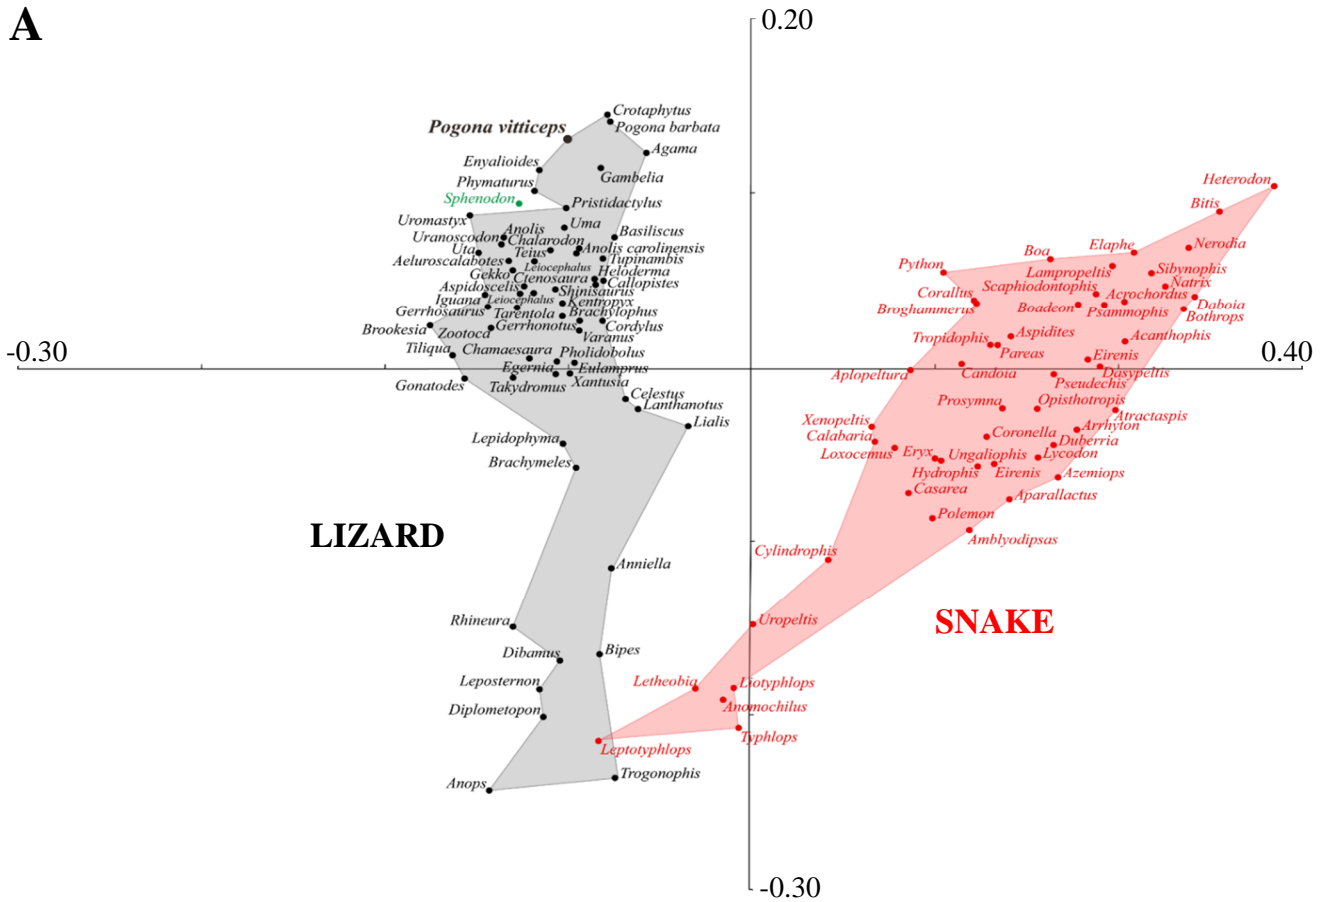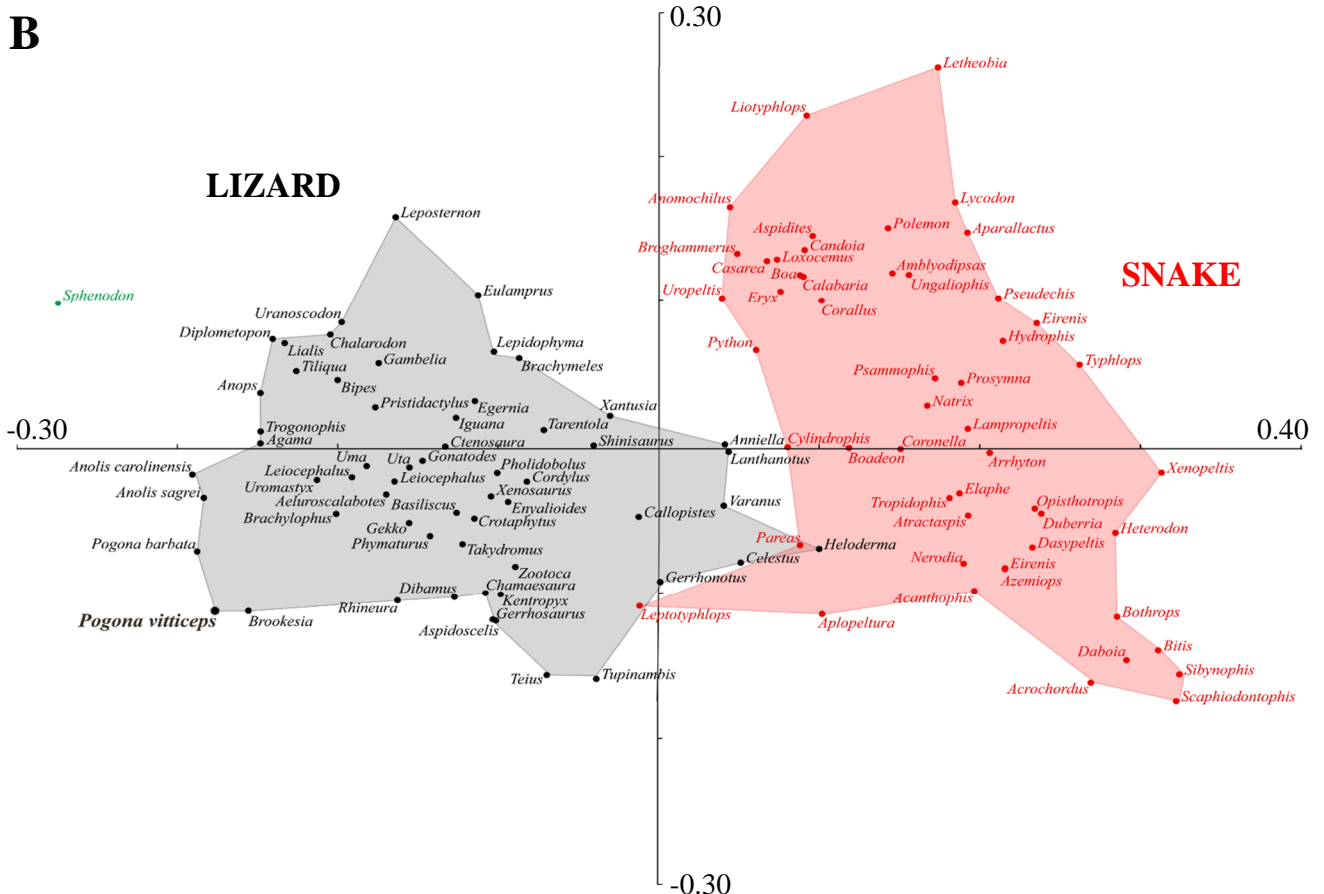

Supplement: DataSheet7.pdf [file DataSheet7.pdf]
