# Supplementary material for: Skull Development, Ossification Pattern, and Adult Shape in the Emerging Lizard Model Organism Pogona vitticeps: A Comparative Analysis With Other Squamates
Source: PubMed Central journal article supplement (PMC5882870; doi:10.3389/fphys.2018.00278), 2018-03-28
Supplement: DataSheet8.pdf [file DataSheet8.pdf]

**Additional file 8.** Multivariate analysis of variance (MANOVA) with post hoc pairwise comparisons of cranium and mandible shape between major groups of squamates. *F*-values and *p*-values are shown in upper and lower off-diagonal cells, respectively. Significant values are highlighted in bold.

| CRANIUM     | Anguimorpha   | Gekkota       | Iguania           | Lacertoidea   | Scincoidea    | Serpentes    |
|-------------|---------------|---------------|-------------------|---------------|---------------|--------------|
| Anguimorpha | -             | 2.71          | 3.5               | 1.41          | <b>5.44</b>   | <b>5.58</b>  |
| Gekkota     | 0.1307        | -             | 1.17              | 2.49          | 3.23          | <b>11.95</b> |
| Iguania     | 0.0696        | 0.2882        | -                 | <b>16.98</b>  | <b>18.16</b>  | <b>21.03</b> |
| Lacertoidea | 0.2496        | 0.1344        | <b>0.0002</b>     | -             | 0.69          | <b>5.25</b>  |
| Scincoidea  | <b>0.0351</b> | 0.0996        | <b>0.0002</b>     | 0.417         | -             | <b>7.07</b>  |
| Serpentes   | <b>0.0216</b> | <b>0.0011</b> | <b>&lt;0.0001</b> | <b>0.0253</b> | <b>0.0101</b> | -            |

| MANDIBLE    | Anguimorpha   | Gekkota       | Iguania       | Lacertoidea   | Scincoidea    | Serpentes   |
|-------------|---------------|---------------|---------------|---------------|---------------|-------------|
| Anguimorpha | -             | 0.21          | <b>16.25</b>  | 1.20          | 2.34          | <b>7.70</b> |
| Gekkota     | 0.6533        | -             | <b>8.73</b>   | 1.01          | 1.78          | <b>4.32</b> |
| Iguania     | <b>0.0004</b> | <b>0.0069</b> | -             | 2.55          | <b>6.65</b>   | <b>7.14</b> |
| Lacertoidea | 0.2868        | 0.3309        | 0.1197        | -             | 0.12          | <b>7.93</b> |
| Scincoidea  | 0.1486        | 0.2092        | <b>0.0155</b> | 0.7296        | -             | <b>5.33</b> |
| Serpentes   | <b>0.0074</b> | <b>0.0425</b> | <b>0.0089</b> | <b>0.0065</b> | <b>0.0246</b> | -           |
